# Supplementary material for: Perceptions on Extending the Use of Technology after the COVID-19 Pandemic Resolves: A Qualitative Study with Older Adults
Source: MDPI journal article supplement (doi:10.3390/ijerph192114152), 2022-10-29
Supplement: s1 [file s1]

---

**Table S1.** Portuguese cases interviews overview.

| Case         | How Was the Interview Conducted? | Total of Interview Sessions | Total Interview Time (min) |
|--------------|----------------------------------|-----------------------------|----------------------------|
| Case 1       | Video – remote online            | 2                           | 118.62                     |
| Case 2       | Video – remote online            | 2                           | 102.5                      |
| Case 3       | Video – remote online            | 2                           | 154.52                     |
| Case 4       | Video – remote online            | 2                           | 205.69                     |
| Case 5       | Video – remote online            | 2                           | 114.74                     |
| Case 6       | Video – remote online            | 2                           | 95.49                      |
| Case 7       | Video – remote online            | 3                           | 156.82                     |
| Case 8       | Video – remote online            | 2                           | 101.55                     |
| Case 9       | Presential at home               | 2                           | 140.22                     |
| Case 10      | Video – remote online            | 2                           | 142.48                     |
| <b>Total</b> |                                  | <b>21</b>                   | <b>1322.63</b>             |

---
